17 **Abstract**

18 Previous studies, including our own, have demonstrated that transient receptor potential  
19 vanilloid 4 (TRPV4) is expressed in hearts and implicated in cardiac remodeling and cardiac  
20 dysfunction. However, the effects of TRPV4 on pressure overload-induced cardiac hypertrophy  
21 remain unclear. In this study, we found that TRPV4 expression was significantly increased in  
22 mouse hypertrophic hearts, human failing hearts, and neurohormone-induced hypertrophic  
23 cardiomyocytes. Deletion of TRPV4 attenuated transverse aortic constriction (TAC)-induced  
24 cardiac hypertrophy, cardiac dysfunction, fibrosis, inflammation, and the activation of NFκB -  
25 NOD-like receptor pyrin domain-containing protein 3 (NLRP3) in mice. In vitro, TRPV4  
26 inhibition decreased the neurohormone-induced cardiomyocyte hypertrophy and the increase  
27 of intracellular Ca<sup>2+</sup> concentration. TRPV4 agonist triggered Ca<sup>2+</sup> influx and evoked the  
28 phosphorylation of Ca<sup>2+</sup>/calmodulin-dependent protein kinase II (CaMKII) but these effects  
29 were abolished by removing extracellular Ca<sup>2+</sup> or TRPV4 inhibition. More importantly, TAC  
30 or neurohormone stimulation-induced CaMKII phosphorylation was significantly blocked by  
31 TRPV4 inhibition. Finally, we showed that CaMKII inhibition significantly inhibited the  
32 phosphorylation of NFκB induced by TRPV4 activation. Our results suggest that TRPV4  
33 activation contributed to pressure overload-induced cardiac hypertrophy. This effect was  
34 associated with upregulated Ca<sup>2+</sup>/ CaMKII mediated the activation of NFκB-NLRP3. Thus,  
35 TRPV4 may represent a potential therapeutic drug target for cardiac hypertrophy.

36 **Key words:** TRPV4; Ca<sup>2+</sup>/calmodulin-dependent protein kinase II; NFκB; NOD-like receptor  
37 pyrin domain-containing protein 3; cardiac hypertrophy; mechanosensitive channels; medicine;  
38 mouse.

## 39 **Introduction**

40 In response to pathological stimuli such as hypertension, valvular heart disease, or  
41 neurohumoral overactivation, the heart undergoes hypertrophy. Initially, the hypertrophy  
42 response is adaptive; however, sustained cardiac hypertrophy results in increased heart mass,  
43 cardiac fibrosis, and eventually heart failure(Bui, et al.,2011; Nakamura and Sadoshima,2018).  
44 Although significant advances in the treatment of pathological hypertrophy, heart failure still  
45 is a leading cause of death worldwide(Neubauer,2007). Thus, to deeply uncover the molecular  
46 mechanism of pathological cardiac hypertrophy continues to be important for developing novel  
47 therapeutic strategies for the prevention of cardiac remodeling and dysfunction(Kalman, et  
48 al.,2019).

49 Increased mechanical stress plays a key role in cardiac hypertrophy. The transient receptor  
50 potential vanilloid (TRPV) channels are ubiquitous ion channels that function as essential  
51 mechanical sensors(Clapham,2003). Interestingly, those channels are upregulated in the hearts  
52 of mice after transverse aortic constriction (TAC), as shown for TRPV1, TRPV2, and  
53 TRPV3(Chen, et al.,2016; Lorin, et al.,2015; Zhang, et al.,2018). Furthermore, the genetic  
54 deletion of functional TRPV2 ameliorates significantly TAC-induced cardiac hypertrophy and  
55 dysfunction(Koch, et al.,2017). These findings suggest the critical role of TRPV in the  
56 development of cardiac remodeling in response to pressure overload.

57 TRPV4, a member of the TRPV subfamily, is widely expressed in the cardiovascular  
58 system(Hof, et al.,2019; White, et al.,2016). Its functional expression is increased under certain  
59 pathological conditions, such as pressure overload(Morine, et al.,2016), aging(Jones, et  
60 al.,2019), ischemia-reperfusion(Dong, et al.,2017; Wu, et al.,2017), and pericarditis(Liao, et

61 al.,2020). Inhibition of TRPV4 attenuates intracellular calcium concentration ( $[Ca^{2+}]_i$ )(Wu, et  
62 al.,2017), cardiac fibrosis(Adapala, et al.,2020), and cardiac inflammation(Liao, et al.,2020),  
63 which improves cardiac function(Wu, et al.,2019). In addition, a potent and selective TRPV4  
64 inhibitor recently revealed a positive efficacy trend in a phase 2a trial in patients with heart  
65 failure(Goyal, et al.,2019; Stewart, et al.,2020). To date, TRPV4 has not been reported in  
66 association with pressure overload-induced cardiac hypertrophy. Therefore, in the present study,  
67 we aimed to investigate the role and the underlying mechanism of TRPV4 in pathological  
68 cardiac hypertrophy subjected to pressure overload.

## 69 **Results**

### 70 **TRPV4 expression is increased in pathological cardiac hypertrophy**

71 To evaluate the potential role of TRPV4 in cardiac hypertrophy, we firstly measured TRPV4  
72 protein and mRNA expression levels in left ventricle (LV) tissue from wild-type (WT) TAC vs.  
73 sham mice 4 weeks after surgery. As shown in Figures 1A-B, TAC induced a two-fold increase  
74 in TRPV4 protein expression. This finding was confirmed with a two-fold increase in mRNA  
75 expression in wild-type TAC hearts (Figure 1C). We also assessed the TRPV4 expression level  
76 in LV tissue from human hearts and found that TRPV4 protein was significantly upregulated  
77 in failing hearts compared with non-failing (Figures 1D-E). Our results indicate that TRPV4  
78 may be implicated in the development of pathological cardiac hypertrophy.

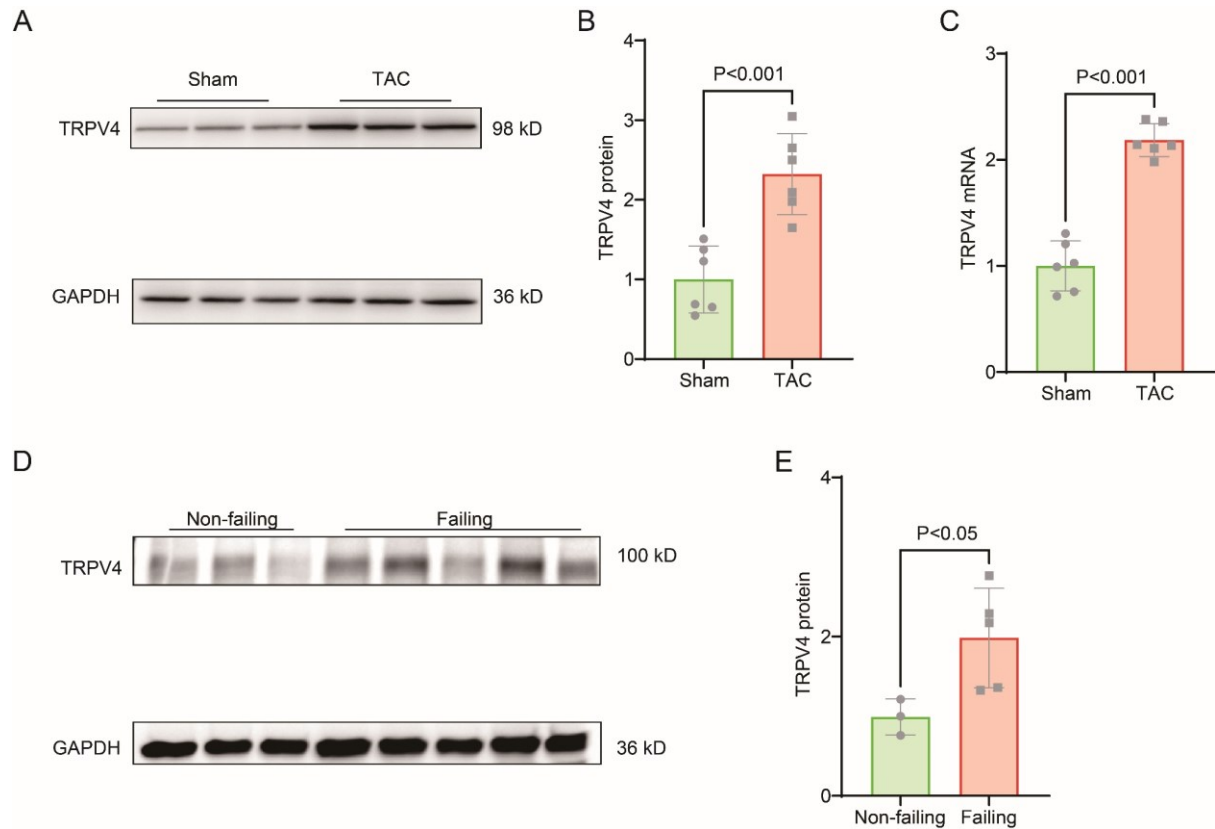

79

80 **Figure 1 TRPV4 expression is upregulated in pathological cardiac hypertrophy.**

81 Representative immunoblot image (A) and statistics (B) of TRPV4 protein level in the LV from

82 sham or TAC mice (n = 6 per group). C. Statistical data of TRPV4 mRNA level in the LV from

83 sham or TAC mice (n = 6 per group). Representative immunoblot image (D) and statistical data

84 (E) of TRPV4 protein level in human non-failing hearts (n = 3) and failing hearts (n = 5). All

85 results represent mean  $\pm$  SD, an unpaired two-tailed student's t-test.

86

87 **TRPV4 deficiency attenuates cardiac hypertrophy induced by pressure overload in vivo**

88 To further investigate the role of TRPV4 in cardiac hypertrophy induced by pressure overload,  
89 we performed TAC or sham surgery in WT and TRPV4 knock-out (TRPV4  $-/-$ ) mice (Figure  
90 2A). We used the ratios of heart weight/body weight (HW/BW) and heart weight /tibial length  
91 (HW/TL) to assess changes in LV mass (Figure 2B-C). As expected, both values in sham-  
92 operated WT and TRPV4 mice were similar (HW/BW ratio:  $4.49 \pm 0.09$  vs  $4.63 \pm 0.13$ , HW/TL  
93 ratio:  $6.34 \pm 0.19$  vs  $6.83 \pm 0.18$ ). TAC induced a 59 and 52% increase (all  $P < 0.001$ ) in HW/BW  
94 ratio and HW/TL ratio, respectively, in WT mice. However, this hypertrophic response to TAC  
95 was attenuated in TRPV4 $-/-$  mice, as evident by only an 18 and 12% increase in HW/BW ratio  
96 ( $P < 0.01$ ) and HW/TL ratio ( $P < 0.05$ ), respectively. Next, we measured the cross-sectional area  
97 of myocytes in all groups. As shown in Figure 2D, cell surface area increased in both WT and  
98 TRPV4 $-/-$  mice after TAC, however, the increase was significantly attenuated in TRPV4 $-/-$   
99 myocytes compared with WT ( $281.25 \pm 39.69 \mu\text{m}^2$  vs  $547.17 \pm 109.26 \mu\text{m}^2$ ,  $P < 0.001$ ). In order  
100 to confirm our findings at the molecular level, we then detected cardiac hypertrophic marker  
101 genes expression. Both ANP and BNP mRNA expression were significantly higher in WT  
102 hearts compared with TRPV4 $-/-$  hearts after TAC. There was no significant difference between  
103 WT and TRPV4 $-/-$  in the sham group (Figure 2E-F). These results suggest that TRPV4  
104 activation plays a critical role in pressure overload-induced cardiac hypertrophy.

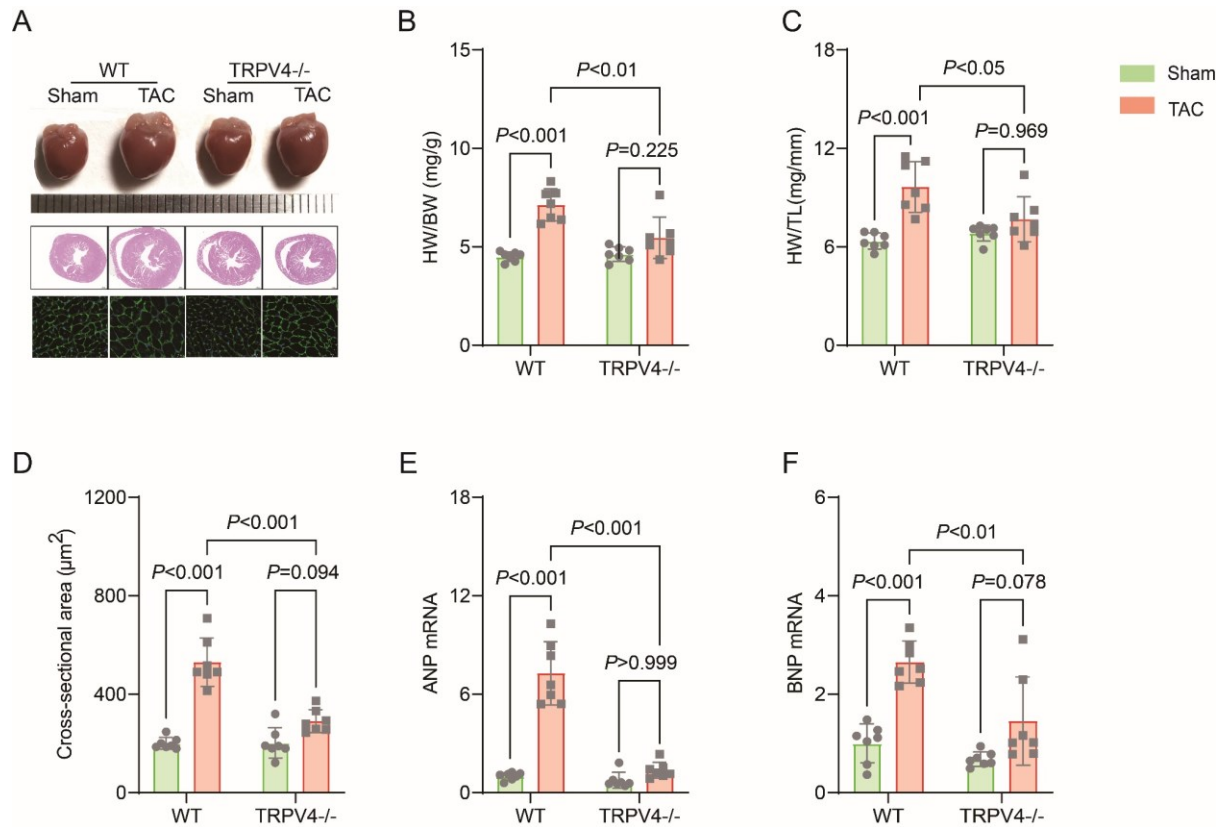

105

106 **Figure 2. TRPV4 deficiency attenuates pressure overload-induced cardiac hypertrophy.**

107 Representative images of heart photo, H&E staining, and WGA staining of WT and TRPV4<sup>-/-</sup>

108 mice at 4 weeks after sham or TAC operation (A). Statistical results for the ratios of HW/BW

109 (B), HW/TL (C), and cross-section area (D) in mice 4 weeks after sham or TAC operation (n =

110 7 per group). Statistics of hypertrophy-related genes ANP (E) and BNP (F) mRNA levels in

111 mouse hearts 4 weeks after sham or TAC operation (n = 7 per group). All results represent

112 mean  $\pm$  SD, a two-way ANOVA followed by the Bonferroni test.

113

114 **TRPV4 deficiency attenuates cardiac dysfunction and cardiac fibrosis induced by**  
115 **pressure overload**

116 Echocardiography was performed to monitor the progression of cardiac structure and  
117 functional changes (Figure 3A). A reduction in ejection fraction (EF,  $52.83 \pm 4.34\%$  vs  
118  $73.44 \pm 2.47\%$ ,  $P < 0.001$ , Figure 3B) and fractional shortening (FS,  $26.87 \pm 2.64\%$  vs  
119  $41.34 \pm 1.97\%$ ,  $P < 0.001$ , Figure 3C) in WT mice were reversed in TRPV4<sup>-/-</sup> mice at 4 weeks  
120 after TAC. Consistently, LV internal dimension systole and LV mass were significantly  
121 increased in WT TAC mice, but these effects were not found in TRPV4<sup>-/-</sup> TAC mice (Figure  
122 3D-E). Other parameters of LV remodeling including LV posterior end-diastolic wall thickness  
123 (LVPW), LV end-diastolic diameter (LVEDD), and LV end-diastolic volume (LVEDV) were  
124 also well preserved in TRPV4<sup>-/-</sup> mice compared with WT mice after TAC (Table 1).

125 Cardiac interstitial and perivascular fibrosis were assessed in Masson's Trichrome stained  
126 sections at 4 weeks after TAC surgery (Figure 3F). There was no significant difference in the  
127 extents of fibrosis in WT and TRPV4<sup>-/-</sup> mice in the sham groups. However, both interstitial  
128 and perivascular fibrosis increased in WT hearts after TAC, with more pronounced perivascular  
129 changes. This increase in interstitial and perivascular fibrosis was significantly blunted in  
130 TRPV4<sup>-/-</sup> hearts after TAC ( $2.48 \pm 0.95\%$  vs  $0.41 \pm 0.20\%$ ,  $P < 0.001$ , Figure 3G). In addition,  
131 quantitative real-time PCR revealed a marked reduction in fibrosis markers (collagenase-1,  
132 collagenase-3, and galectin-3, Figure 3H-J).



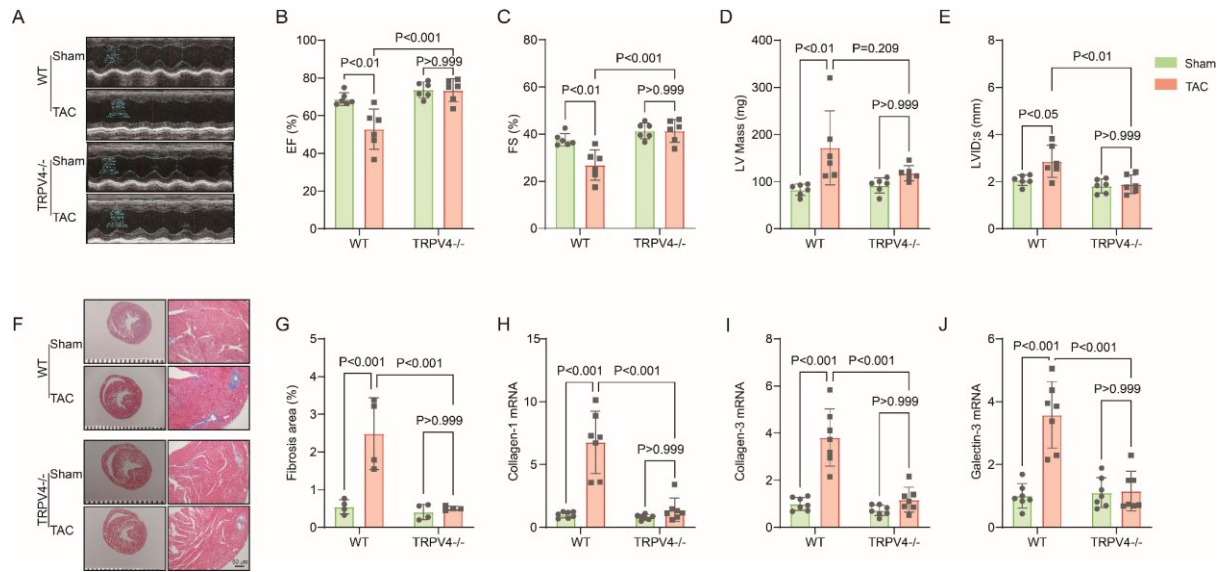

133

134 **Figure 3. TRPV4 deficiency improves cardiac function and attenuates cardiac fibrosis**

135 **induced by pressure overload.** Representative images of M-mode echocardiography of WT

136 and TRPV4<sup>-/-</sup> mice at 4 weeks after sham or TAC operation (A). Statistics of EF (B), FS (C),

137 LV mass (D), and LVIDs (E) in mice at 4 weeks after sham or TAC operation (n = 6 per group).

138 Representative images (F) and statistics (G) of Masson's trichrome-stained hearts from mice

139 at 4 weeks after sham or TAC operation. The statistics were from the panoramic scanning

140 pictures (n = 4 each group). Statistics of fibrosis-related genes collagenase-1 (H), collagenase-

141 3 (I), and galectin-3 (J) mRNA levels in mouse hearts 4 weeks after sham or TAC operation (n

142 = 7 per group). All results represent mean ± SD, a two-way ANOVA followed by the Bonferroni

143 test.

144

145

146 **Table 1 Echocardiographic measurements 4 weeks after TAC**

147

|                    | WT           |                          | TRPV4 <sup>-/-</sup> |                          |
|--------------------|--------------|--------------------------|----------------------|--------------------------|
|                    | Sham         | TAC                      | Sham                 | TAC                      |
| Heart rate (bpm)   | 457.61±11.77 | 463.11±16.96             | 463.11±18.86         | 443.78±10.38             |
| LVAW,s (mm)        | 1.29±0.14    | 1.41±0.18                | 1.21±0.2             | 1.48±0.17                |
| LVID,d (mm)        | 3.32±0.12    | 3.81±0.59                | 2.92±0.38            | 3.11±0.47                |
| LVPW,d (mm)        | 0.70±0.08    | 1.08±0.46                | 0.92±0.39            | 1.02±0.37                |
| LVPW,s (mm)        | 1.17±0.11    | 1.41±0.57                | 1.33±0.34            | 1.59±0.31                |
| Diameter,s (mm)    | 2.05±0.13    | 2.67±0.57                | 1.69±0.32            | 1.80±0.37 <sup>##</sup>  |
| Diameter,d (mm)    | 3.29±0.12    | 3.62±0.48                | 2.87±0.42            | 3.04±0.45                |
| Volume,s (μL)      | 13.73±2.17   | 28.01±14.43 <sup>*</sup> | 8.79±4.00            | 10.36±5.41 <sup>##</sup> |
| Volume,d (μL)      | 43.88±3.84   | 56.39±17.41              | 32.23±11.02          | 37.38±12.30              |
| Stroke volume (μL) | 30.14±2.43   | 28.39±4.67               | 23.44±7.19           | 27.02±7.52               |

148

149 LVAW,s: systolic left ventricular anterior wall, LVID,s: systolic left ventricular internal  
 150 diameter, LVPW,d: diastolic left ventricular posterior wall, LVPW,s: systolic left ventricular  
 151 posterior wall, Data represent means ± SD, n = 6/group, \**P* < 0.05 WT TAC vs WT sham group.  
 152 <sup>##</sup> *P* < 0.01 TRPV4<sup>-/-</sup> TAC vs WT TAC group

153

154 **TRPV4 deficiency attenuates the inflammation induced by pressure overload**

155 Chronic inflammation promotes cardiac fibrosis(Adamo, et al.,2020). Thus, we detected the  
 156 protein and mRNA levels of pro-inflammatory cytokines. As shown in Figures 4A-D, TAC  
 157 significantly upregulated the protein levels of IL-1β, IL-6, and TNF-α in WT mice, and TRPV4  
 158 deletion diminished this elevation. Consistent with these observations, the TAC-induced  
 159 increases in mRNA expression of IL-1β, IL-6, TNF-α, MIP-2, and MCP-1 were significantly  
 160 attenuated in TRPV4<sup>-/-</sup> mice (Figures 4E-I).

161 The NOD-like receptor pyrin domain-containing protein 3 (NLRP3) inflammasome  
 162 consists of ASC, NLRP3, and caspase-1(Martinon and Tschopp,2004). Its activation  
 163 contributes to the development of cardiac hypertrophy by cleaving pro-caspase-1 and  
 164 promoting the release of proinflammatory cytokine IL-β(Suetomi, et al.,2019; Suetomi, et  
 165 al.,2018). NFκB represents a family of inducible transcription factors, which regulates various

166 genes involved in inflammatory responses. We then assessed the activation of NLRP3  
 167 inflammasome and the phosphorylation of NF $\kappa$ B (Figure 4J). As shown in Figures 4K-L, TAC  
 168 significantly upregulated the protein levels of ASC, NLRP3, and cleaved caspase-1 (p20) in  
 169 WT mice. We also found the expression of p-NF $\kappa$ B p65 (ser536) was greatly upregulated in  
 170 WT mice after TAC surgery (Figure 4N). Interestingly, TRPV4 deletion efficiently decreased  
 171 the ASC, NLRP3, cleaved caspase-1, and p-NF $\kappa$ B p65 protein levels.

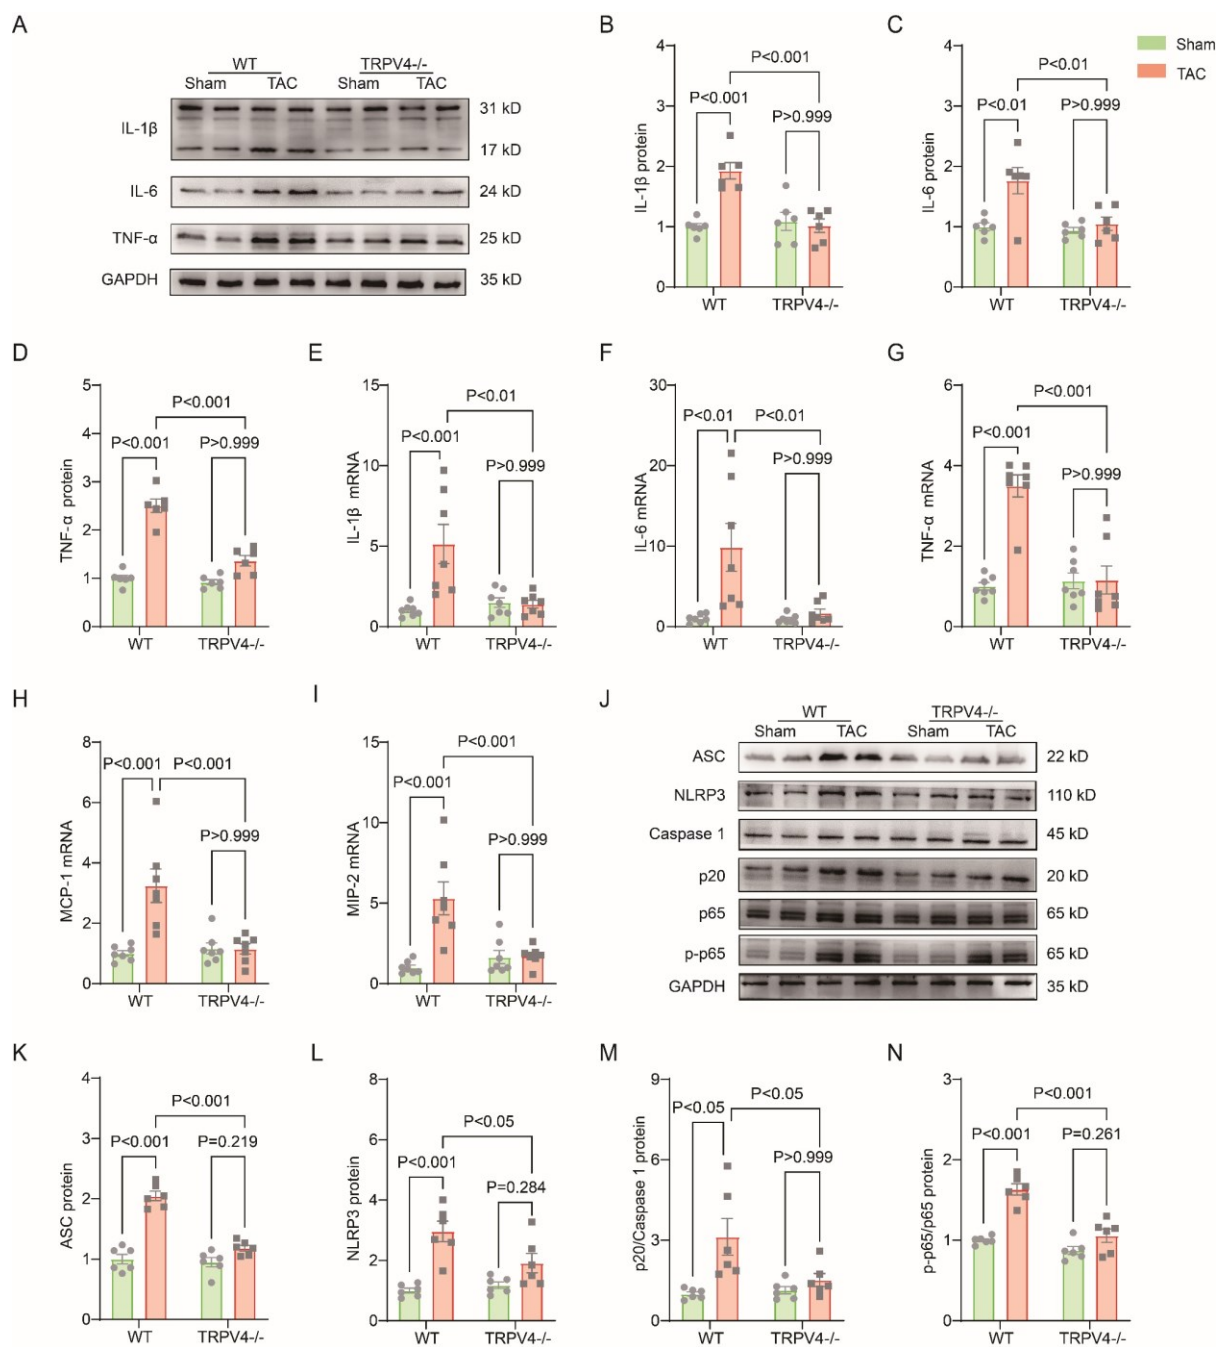

172

173 **Figure 4. TRPV4 deficiency attenuates cardiac fibrosis induced by pressure overload.**

174 Representative immunoblot image (A) and statistics of IL-1 $\beta$  (B), IL-6 (C), and TNF- $\alpha$  (D)  
175 protein levels in WT and TRPV4<sup>-/-</sup> mice at 4 weeks after sham or TAC operation (n = 6 per  
176 group). Statistical data of IL-1 $\beta$  (E), IL-6 (F), TNF- $\alpha$  (G), MCP-1 (H), and MIP-2 (I) mRNA  
177 levels in mouse hearts 4 weeks after sham or TAC operation (n = 7 per group). Representative  
178 immunoblot image (J) and statistics of ASC (K), NLRP3 (L), Caspase 1-p20 (M), and p-NF $\kappa$ B  
179 p65 (N) protein levels in WT and TRPV4<sup>-/-</sup> mice at 4 weeks after sham or TAC operation (n =  
180 6 per group). All results represent mean  $\pm$  SD, a two-way ANOVA followed by the Bonferroni  
181 test.

182 **The TRPV4 antagonist improves neonatal rat ventricular myocytes (NRVMs)**  
183 **hypertrophy in vitro**

184 Next, we sought to determine whether TRPV4 activation contributes to cardiomyocyte  
185 hypertrophy in vitro. NRVMs were isolated from neonatal Sprague-Dawley (SD) rats and  
186 treated with angiotensin II (Ang II) or phenylephrine (PE) for 48 hours. We found that AngII-  
187 stimulated cardiac hypertrophy, as indicated by increases in cell surface area (Figures 5 A-B)  
188 and expression of ANP and BNP (Figures 5 C-D), were largely inhibited by the TRPV4 specific  
189 antagonist GSK2193874 (GSK3874). Similarly, PE-induced CM hypertrophy was also  
190 attenuated by GSK3874 (Figures 5E-H). Taken together, our results confirmed that TRPV4  
191 activation contributes to cardiac hypertrophy in vitro.

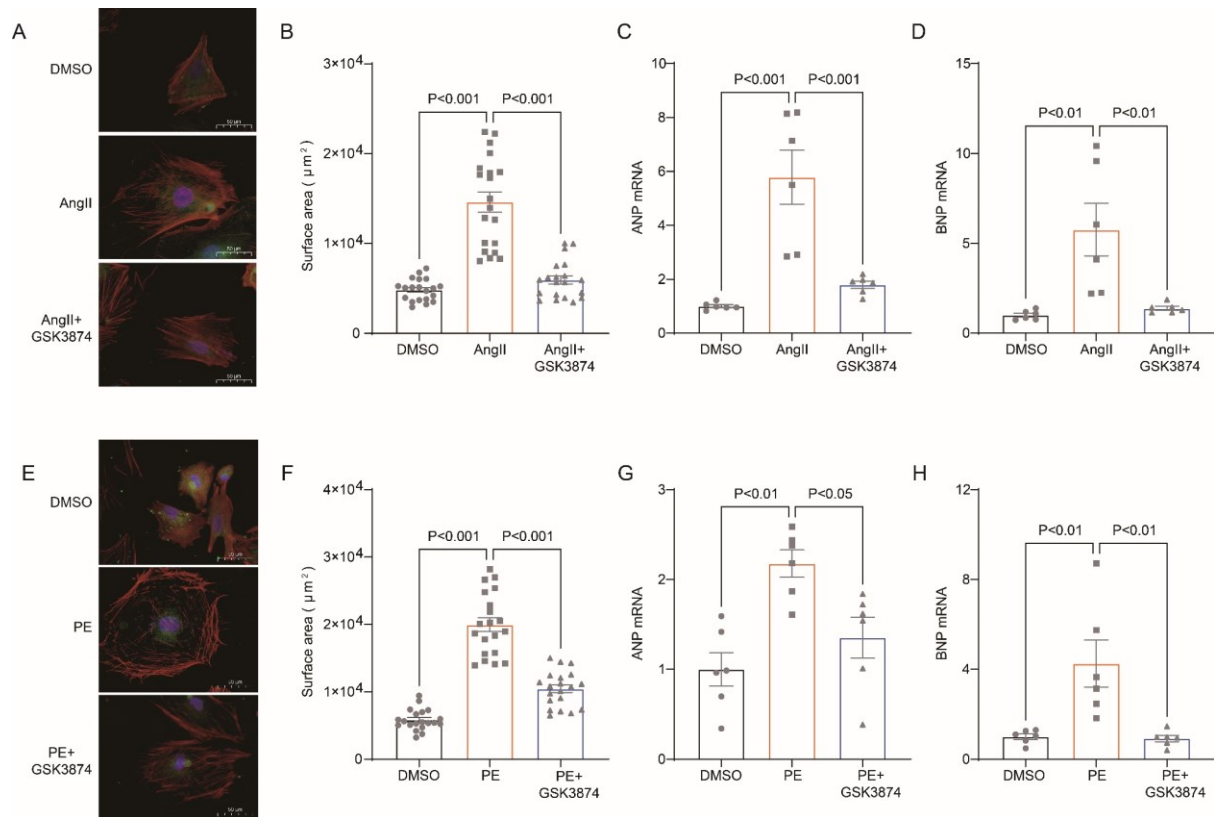

192

193 **Figure 5. TRPV4 blockade attenuates AngII/PE-induced hypertrophy in NRVMs *in vitro*.**

194 Representative images (A) and statistics of the cell-surface areas (B) in NRVMs treated with

195 DMSO, AngII, and AngII plus GSK3874 (n = 20 cells from 3 animals. Statistics of ANP (C)

196 and BNP (D) mRNA levels in NRVMs treated with DMSO, AngII, and AngII plus GSK3874

197 (n = 6 per group). Representative images (E) and statistics of the cell-surface areas (F) in

198 NRVMs treated with DMSO, PE, and PE plus GSK3874 (n = 20 cells from 3 animals).

199 Statistics of ANP (G) and BNP (H) mRNA levels in NRVMs treated with DMSO, PE, and PE

200 plus GSK3874 (n = 6 per group). All results represent mean ± SD, a one-way ANOVA followed

201 by the Bonferroni test.

202 **TRPV4 antagonist alleviates on AngII/PE induced Ca<sup>2+</sup> overload in NRVMs**

203 It is well known that the [Ca<sup>2+</sup>]<sub>i</sub> increases in response to sustained hypertrophy. We have

204 previously shown that TRPV4 functionally expresses in cardiomyocytes and mediates Ca<sup>2+</sup>

205 influx upon activation(Wu, et al.,2017). Here, we found that TRPV4 protein and mRNA  
206 expression was significantly increased in NRVMs after being treated with AngII (Figure 6A-  
207 C). To correlate TRPV4 expression to functional channel, changes in  $[Ca^{2+}]_i$  in response to the  
208 specific TRPV4 agonist GSK1016790A (GSK790A, 500 nM), were measured in NRVMs after  
209 AngII stimulation. As shown in Figure 6D-E, GSK790A induced robust  $Ca^{2+}$  influx, which was  
210 further enhanced after stimulation with AngII. However, pre-incubation of GSK3874 could  
211 inhibit this enhanced response. Please note, treatment with AngII or AngII + GSK3874 had no  
212 effect on  $Ca^{2+}$  influx induced by A23187 (Figure 6F). Similar results were also obtained from  
213 NRVMs after PE stimulation (Figures 6G-I). Our results indicate that TRPV4 activation may  
214 be implicated in  $[Ca^{2+}]_i$  rise induced by sustained hypertrophy.  
215

216

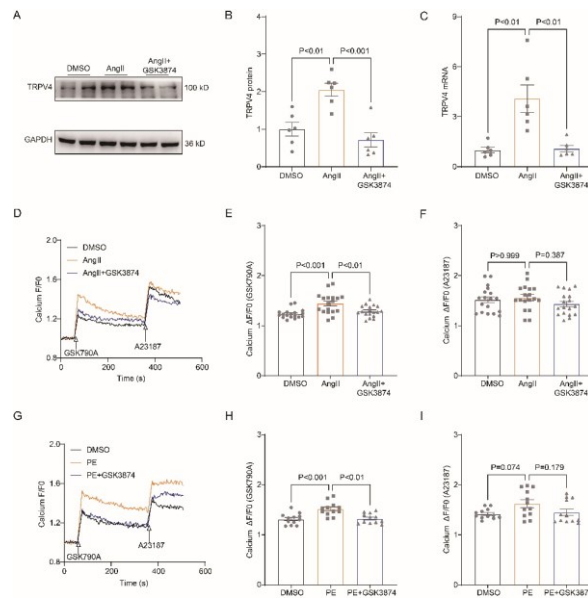

217

218 **Figure 6. TRPV4 blockade attenuates AngII/PE-induced Ca<sup>2+</sup> overload in NRVMs.**

219 Representative immunoblot image (A) and statistics (B) of TRPV4 protein level in NRVMs

220 treated with DMSO, AngII, and AngII plus GSK3874 (n = 6 per group). C. Statistical data of

221 TRPV4 mRNA level in NRVMs treated with DMSO, AngII, and AngII plus GSK3874 (n = 6

222 per group). Representative recording of changes in intracellular Ca<sup>2+</sup> induced by 500 nM GSK

223 790A and 1 μM A23187 in NRVMs treated with DMSO, AngII, and AngII plus GSK3874 (D).

224 Quantification of [Ca<sup>2+</sup>]<sub>i</sub> response induced by GSK790A (E) and A23187(F) -induced in

225 NRVMs treated with DMSO, AngII, and AngII plus GSK3874 (n = 18 per group).

226 Representative recording of changes in intracellular Ca<sup>2+</sup> induced by 500 nM GSK 790A and

227 1 μM A23187 in NRVMs treated with DMSO, PE, and PE plus GSK3874 (G). Quantification

228 of [Ca<sup>2+</sup>]<sub>i</sub> response induced by GSK790A (H) and A23187(I)-induced in NRVMs treated with

229 DMSO, PE, and PE plus GSK3874 (n = 10 per group). The arrow indicates the time of addition

230 of GSK1016790A and A21387. All results represent mean ± SD, a one-way ANOVA followed

231 by the Bonferroni test.

232 **TRPV4 Activation contributes to CaMKII phosphorylated**

233 Ca<sup>2+</sup>/calmodulin-dependent protein kinase II (CaMKII) is upregulated after pressure overload  
234 and plays an essential role in cardiac hypertrophy and the progression of heart  
235 failure(Ljubojevic-Holzer, et al.,2020; Zhang, et al.,2003). More importantly, Ca<sup>2+</sup> entry via  
236 TRPV4 can activate CaMKII in many other cells(Lyons, et al.,2017; Woolums, et al.,2020;  
237 Zhou, et al.,2021). Therefore, we hypothesized that TRPV4 activation contributes to cardiac  
238 hypertrophy through CaMKII. We first investigated the role of TRPV4 on CaMKII activation.  
239 Using NRVMs in vitro, we found that treatment with TRPV4 agonist GSK790A for 30 min  
240 markedly increases the expression of p-CaMKII (Thr287) compared with the DMSO group.  
241 However, GSK790A-induced activation of CaMKII was significantly blocked by either  
242 pretreating with TRPV4 antagonist GSK3874 or removing extracellular Ca<sup>2+</sup>, demonstrating  
243 that TRPV4-mediated Ca<sup>2+</sup> influx promotes the activation of CaMKII (Figures 7A-D).

244 Consistent with previous studies(Xiao, et al.,2018), NRVMs stimulated AngII for 48 h  
245 showed a 2-folds increase in p-CaMKII, and this response was largely abrogated by  
246 pretreatment with GSK3874 (Figures 7E-F). In vivo, TAC induced the upregulation of p-  
247 CaMKII in WT mice, but this response was not observed in TRPV4<sup>-/-</sup> mice (Figures 7G-H).  
248 Our results indicate that TRPV4 activation was required for the phosphorylation of CaMKII in  
249 response to pressure overload.



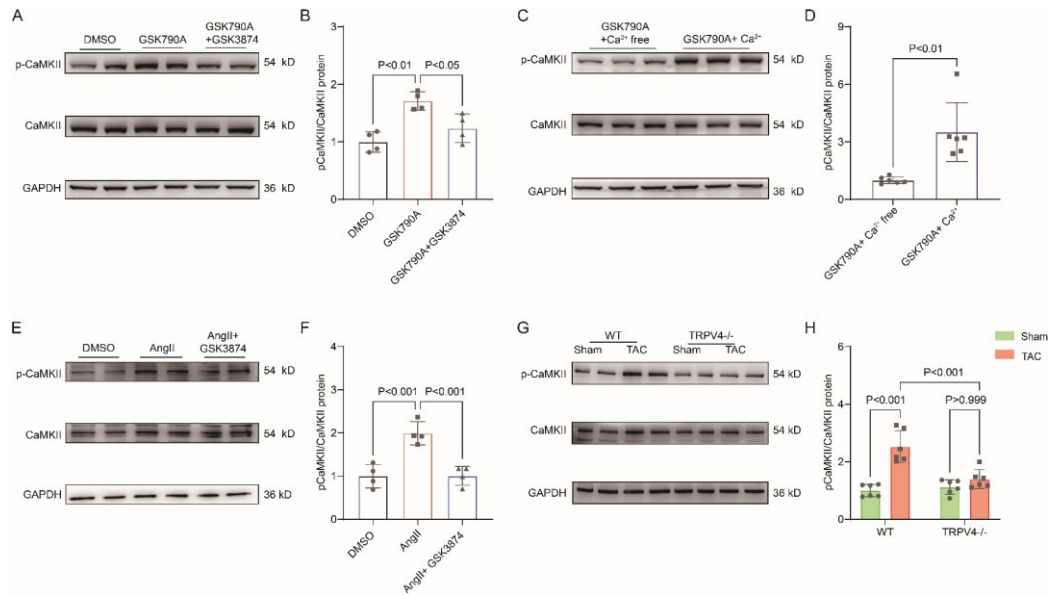

250

251 **Figure 7. TRPV4 activation induces CaMKII phosphorylation.** Representative immunoblot

252 image (A) and statistics (B) of p-CaMKII/CaMKII in NRVMs treated with DMSO, GSK790A,

253 and GSK790A plus GSK3874 (n = 4 per group). All results represent mean ± SD, a one-way

254 ANOVA followed by the Bonferroni test. Representative immunoblot image (C) and statistics

255 (D) of p-CaMKII/CaMKII in NRVMs treated with GSK790A in the absence and presence of

256 Ca<sup>2+</sup> medium (n = 6 per group). All results represent mean ± SD, an unpaired two-tailed

257 student's t-test. Representative immunoblot image (E) and statistics (F) of p-CaMKII/CaMKII

258 in NRVMs treated with DMSO, AngII, and AngII plus GSK3874 (n = 4 per group). All results

259 represent mean ± SD, a one-way ANOVA followed by the Bonferroni test. Representative

260 immunoblot image (G) and statistics (H) of p-CaMKII/CaMKII in WT and TRPV4<sup>-/-</sup> mice at

261 4 weeks after sham or TAC operation (n = 6 per group). All results represent mean ± SD, a two-

262 way ANOVA followed by the Bonferroni test.

263

264 **TRPV4 activation promotes NFκB phosphorylation via a CaMKII-dependent manner**

265 As shown in Figure 8A-B, a short-term (30 min) treatment with TRPV4 agonist GSK790A also  
266 dramatically increased the level of phosphorylated NFκB p65 in NRVMs. This effect was  
267 abolished by the pretreatment with TRPV4 antagonist GSK3874. Furthermore, AngII-induced  
268 phosphorylation of NFκB p65 was also prevented by pretreatment with GSK3874 (Figure 8C-  
269 D). Therefore, TRPV4 activation may promote the phosphorylation of NFκB p65.

270 We then asked how TRPV4 activation is linked to the NFκB signaling. Since the  
271 phosphorylation of NFκB could be regulated by the CaMKII signaling pathway(Ling, et  
272 al.,2013), we examined the involvement of CaMKII. Indeed, the application of a CaMKII  
273 inhibitor, KN93 (2 μM), abolished the GSK790A -stimulated NFκB p65 phosphorylation in  
274 NRVMs, supporting the role of CaMKII in linking TRPV4-mediated Ca<sup>2+</sup> influx to NFκB  
275 activation.

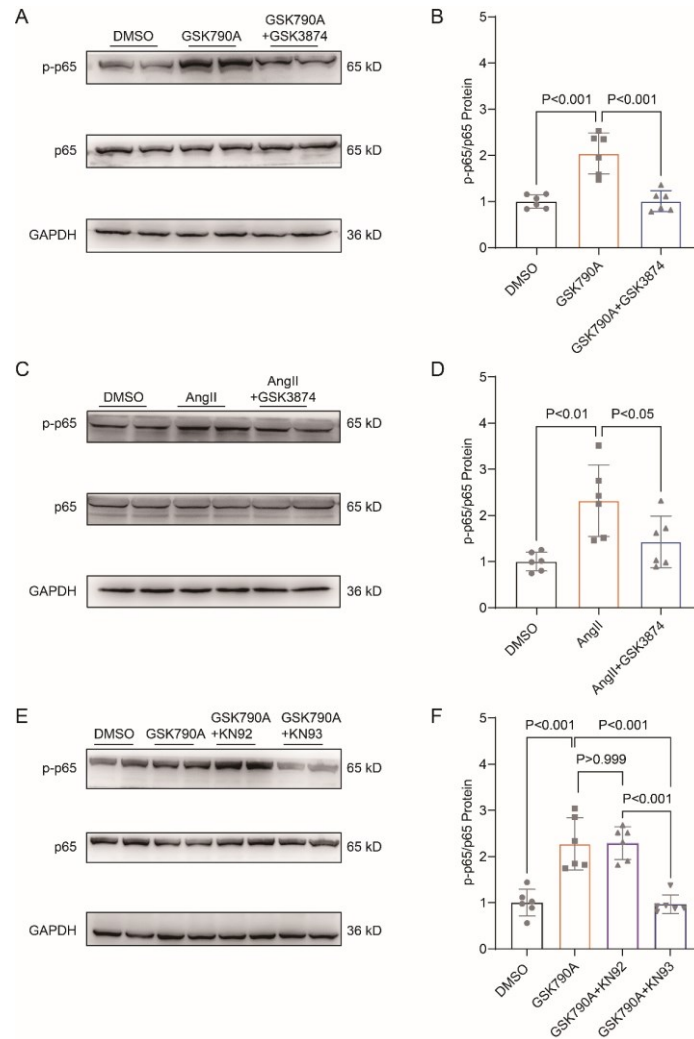

276

277 **Figure 8. TRPV4 activation induces NFκB phosphorylation via a CaMKII signaling**

278 **pathway.** Representative immunoblot image (A) and statistics (B) of p-p65 /p65 in NRVMs

279 treated with DMSO, GSK790A, and GSK790A plus GSK3874 (n = 6 per group). All results

280 represent mean ± SD, a one-way ANOVA followed by the Bonferroni test. Representative

281 immunoblot image (C) and statistics (D) of p-p65 /p65 in NRVMs treated DMSO, AngII, and

282 AngII plus GSK3874 (n = 6 per group). All results represent mean ± SD, a one-way ANOVA

283 followed by the Bonferroni test. Representative immunoblot image (E) and statistics (F) of p-

284 p65 /p65 in NRVMs treated with DMSO, GSK790A, GSK790A plus KN92, and GSK790A

285 plus KN93 (n = 6 per group). All results represent mean ± SD, a one-way ANOVA followed by

286 the Bonferroni test.

287 **Discussion**

288 In this study, we characterized the functional role of TRPV4 in pressure-induced cardiac  
289 hypertrophy and heart failure. We showed that TRPV4 activation promoted the development  
290 of pathological cardiac hypertrophy and heart failure. This effect was associated with  $Ca^{2+}$ -  
291 mediated CaMKII phosphorylation and subsequently the activation of NF $\kappa$ B-NLRP3 (Figure  
292 9). These results suggest that TRPV4 may be a potential therapeutic target for cardiac  
293 hypertrophy and heart failure.

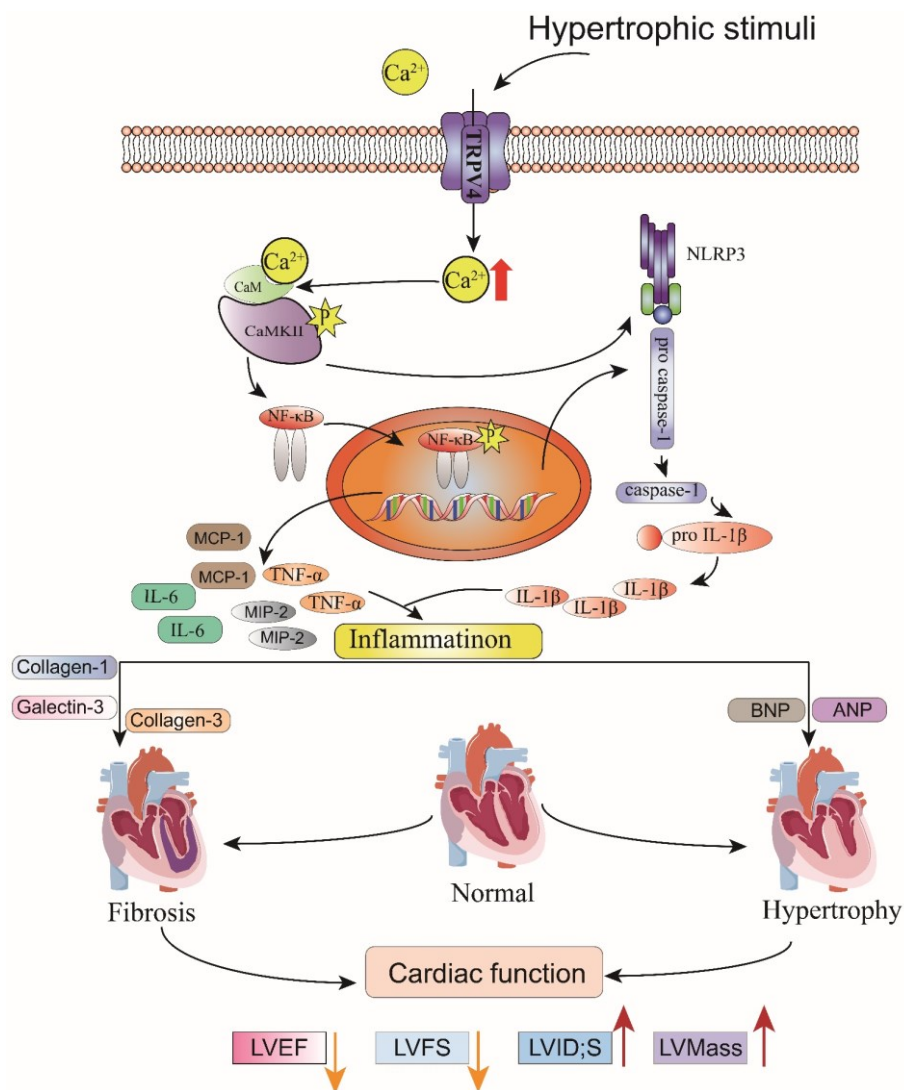

294

295 **Figure 9. Schematic illustration of potential mechanisms through which TRPV4**

296 **activation promotes pathological cardiac hypertrophy.**

297 As a non-selective calcium ion channel, TRPV4 is widely expressed in the cardiovascular  
298 system and mediates cellular responses to a variety of environmental stimuli including hypo-  
299 osmolality, heat, and mechanical loading(Hof, et al.,2019; Randhawa and Jaggi,2015).  
300 Previous studies including our own have demonstrated that TRPV4 is functionally expressed  
301 in hearts(Chaigne, et al.,2021; Peana, et al.,2021; Wu, et al.,2017) and can be upregulated by  
302 pressure overload(Morine, et al.,2016), following ischemia-reperfusion(Dong, et al.,2017;  
303 Jones, et al.,2019; Wu, et al.,2017), under inflammation conditions(Kumar, et al.,2020; Liao,  
304 et al.,2020), as well as after application of TRPV4 agonist GSK790A(Adapala, et al.,2016). Its  
305 activation induces  $Ca^{2+}$  influx and increases  $[Ca^{2+}]_i$ , which may subsequently promote cardiac  
306 remodeling and cardiac dysfunction. However, there are no data demonstrating the role of  
307 TRPV4 in pathological cardiac hypertrophy and heart failure in response to pressure overload.  
308 In the present study, we found that TRPV4 expression was significantly increased in mice  
309 hypertrophy hearts, human failing hearts, and AngII-induced hypertrophic cardiomyocytes,  
310 suggesting that TRPV4 was implicated in the processes of cardiac hypertrophy and failure.  
311 Furthermore, the deletion of TRPV4 attenuated TAC-induced cardiac hypertrophy and  
312 subsequent heart failure in vivo. Our in vitro experiments showed that TRPV4 blockade  
313 protected cardiac hypertrophy induced by AngII. Concomitant with this protection was the  
314 downregulation of multiple proteins and transcriptional markers associated with initiation and  
315 the progression of hypertrophy, inflammation, fibrosis, and heart failure. This data suggested  
316 that TRPV4 may play a role as either an initiating stressor or an upstream signaling transducer  
317 in response to pressure overload.

318 Recent studies have suggested that  $Ca^{2+}$  influx through TRPV4 can result in the activation

319 of CaMKII(Lyons, et al.,2017; Woolums, et al.,2020). CaMKII can be rapidly activated in  
320 response to pressure overload and plays an essential role in cardiac hypertrophy and  
321 decompensation to heart failure(Baier, et al.,2020; Swaminathan, et al.,2012). Therefore, we  
322 hypothesized that TRPV4 experiences mechanical stress, mediates  $Ca^{2+}$  entry, and  
323 subsequently activates pro-hypertrophic signaling responses. Similar to our previous  
324 findings(Wu, et al.,2017), the TRPV4 agonist GSK790A induced robust  $Ca^{2+}$  entry in NRVMs.  
325 We also found GSK790A induced rapid phosphorylation of CaMKII, which could be prevented  
326 by TRPV4 antagonist and extracellular  $Ca^{2+}$  removal, demonstrating that  $Ca^{2+}$  entry following  
327 TRPV4 activation leads to CaMKII phosphorylation. Furthermore, AngII/PE-induced  $[Ca^{2+}]_i$   
328 rise as well as the phosphorylation of CaMKII in NRVMs was significantly reduced by the  
329 TRPV4 antagonist. In addition, our in vivo studies showed that TAC-induced CaMKII  
330 phosphorylation was markedly blunted by genetic TRPV4 deletion. This evidence supports a  
331 key role of TRPV4 in mediating CaMKII activation during cardiac hypertrophy development.

332       Recent studies have shown that activation of CaMKII triggers NF $\kappa$ B-NLRP3 activation  
333 and leads to inflammation, which is important for the initiation and progression of pathological  
334 cardiac hypertrophy(Suetomi, et al.,2018; Willeford, et al.,2018). We found that TAC induced  
335 increases in IL-1 $\beta$ , IL-6, TNF- $\alpha$ , MIP-2, and MCP-1 expression, meanwhile the  
336 phosphorylation of p-65 and the expression of NLRP3, ASC, and cleaved caspase-1 were  
337 upregulated in WT mice. The above-enhanced effects, however, were diminished in TRPV4-/-  
338 mice. Similarly, AngII/PE-induced the upregulation of p-65 phosphorylation in NRVMs was  
339 reduced by the pretreatment with TRPV4 antagonist. These results suggest that TRPV4  
340 activation promoted NF $\kappa$ B-NLRP3 activation and inflammation in response to pressure

341 overload, which further demonstrated a mechanistic for TRPV4 in this response. Several other  
342 studies have also found that TRPV4 activation induces inflammation through the NFκB-  
343 NLRP3 signaling pathway(Wang, et al.,2021; Wang, et al.,2019). Additionally, we found that  
344 GSK790A also induced rapid phosphorylation of NFκB, which could be prevented by KN-93  
345 for CaMKII inhibition, and this implies that CaMKII was involved in TRPV4 activation-  
346 induced the phosphorylation of NFκB. Therefore, our data continued to highlight the  
347 importance of TRPV4-mediated Ca<sup>2+</sup> in intracellular signaling pathways and raise the  
348 possibility that TRPV4 activation promoted Ca<sup>2+</sup> influx, led to the phosphorylation of CaMKII,  
349 and subsequently triggered the activation of NFκB-NLRP3, thus contributing to adverse  
350 cardiac remodeling.

351 An important limitation of our investigation is the use of the systemic functional  
352 abrogation TRPV4 model. TRPV4 is also expressed in cardiac fibroblasts and endothelial cells.  
353 Therefore, the effect of TRPV4 deletion on cardiac remodeling and dysfunction is not limited  
354 to cardiomyocytes. Interactions with cardiac fibroblasts or endothelial cells will need further  
355 study. Although the upregulation of TRPV4 was consistent in mouse hypertrophy hearts and  
356 human failing hearts, our data do not provide conclusive evidence about the involvement of  
357 TRPV4 in hypertensive cardiac damage in patients. Further human studies are needed to verify  
358 our results.

359 Collectively, our findings underscore the concept that TRPV4 might be a stress response  
360 molecule that is upregulated in cardiac hypertrophy. Activation of TRPV4 induced increases in  
361 Ca<sup>2+</sup> influx, activated CaMKII, enhanced pro-inflammatory NFκB-NLRP3 signaling,  
362 promoted inflammation response, thus contributing to pathological cardiac remodeling.

363 TRPV4 antagonism provides an exploitable therapeutic advantage for the treatment of cardiac

364 hypertrophy and subsequent heart failure.

365 **Materials and methods**

366 **Key resource table**

| Reagent type (species) or resource | Designation           | Source or reference | Identifier    | Additional information   |
|------------------------------------|-----------------------|---------------------|---------------|--------------------------|
| Compound                           | Ang II                | MCE                 | Cat# HY-13948 |                          |
| Compound,                          | PE                    | MACKLIN             | Cat# I822933  |                          |
| Compound                           | GSK790A               | Sigma Aldrich       | Cat# G0798    |                          |
| Compound                           | GSK3874               | Sigma Aldrich       | Cat# SML0942  |                          |
| Compound                           | A21387                | Sigma Aldrich       | Cat# G0798    |                          |
| Compound                           | KN92                  | Selleck             | Cat# S6507    |                          |
| Compound                           | KN93                  | Selleck             | Cat# S6787    |                          |
| Sequence-based reagent             | TRPV4_F(mice)         |                     | PCR primers   | CGTCCAAACCTGCGAATGAAGTTC |
| Sequence-based reagent             | TRPV4_R(mice)         |                     | PCR primers   | CCTCCATCTCTTGTTGTCACTGG  |
| Sequence-based reagent             | ANP (Nppa)_F(mice)    |                     | PCR primers   | CTGGGACCCCTCCGATAGAT     |
| Sequence-based reagent             | ANP (Nppa)_R(mice)    |                     | PCR primers   | TTCGGTACCGGAAGCTG        |
| Sequence-based reagent             | BNP (Nppb)_F(mice)    |                     | PCR primers   | GAGTCCTTCGGTCTCAAGGC     |
| Sequence-based reagent             | BNP (Nppb)_R(mice)    |                     | PCR primers   | CAACTTCAGTGCGTTACAGC     |
| Sequence-based reagent             | Collagenase-1_F(mice) |                     | PCR primers   | GAAACCCGAGGTATGCTTGA     |
| Sequence-                          | Collagenase-          |                     | PCR           | GGGTCCCTCGACTCCTACAT     |



|               |                    |         |                         |
|---------------|--------------------|---------|-------------------------|
| based reagent | 1_R(mice)          | primers |                         |
| Sequence-     | Collagenase-       | PCR     | AGCCACCTTGGTCAGTCCTA    |
| based reagent | 3_F(mice)          | primers |                         |
| Sequence-     | Collagenase-       | PCR     | GTGTAGAAGGCTGTGGGCAT    |
| based reagent | 3_R(mice)          | primers |                         |
| Sequence-     | Galectin-          | PCR     | CAGGAAAATGGCAGACAGCTT   |
| based reagent | 3_F(mice)          | primers |                         |
| Sequence-     | Galectin-          | PCR     | CCCATGCACCCGGATATC      |
| based reagent | 3_R(mice)          | primers |                         |
| Sequence-     | IL-                | PCR     | TGCCACCTTTTGACAGTGATG   |
| based reagent | 1 $\beta$ _F(mice) | primers |                         |
| Sequence-     | IL-                | PCR     | TGATGTGCTGCTGCGAGATT    |
| based reagent | 1 $\beta$ _R(mice) | primers |                         |
| Sequence-     | IL-6_F(mice)       | PCR     | GATAAGCTGGAGTCACAGAAGG  |
| based reagent |                    | primers |                         |
| Sequence-     | IL-6_R(mice)       | PCR     | TTGCCGAGTAGATCTCAAAGT   |
| based reagent |                    | primers |                         |
| Sequence-     | TNF-               | PCR     | CCCCAAAGGGATGAGAAGTT    |
| based reagent | $\alpha$ _F(mice)  | primers |                         |
| Sequence-     | TNF-               | PCR     | ACTTGGTGGTTTGCTACGA     |
| based reagent | $\alpha$ _R(mice)  | primers |                         |
| Sequence-     | MIP-               | PCR     | CGCCCAGACAGAAGTCATAG    |
| based reagent | 2_F(mice)          | primers |                         |
| Sequence-     | MIP-               | PCR     | TCCTCCTTTCCAGGTCAGTTA   |
| based reagent | 2_R(mice)          | primers |                         |
| Sequence-     | MCP-               | PCR     | TTTTTGTCACCAAGCTCAAGAG  |
| based reagent | 1_F(mice)          | primers |                         |
| Sequence-     | MCP-               | PCR     | TTCTGATCCTCATTTGGTTCCGA |
| based reagent | 1_R(mice)          | primers |                         |
| Sequence-     | GAPDH_F(m          | PCR     | AAGAAGGTGGTGAAGCAGGCAT  |
| based reagent | ice)               | primers |                         |
| Sequence-     | GAPDH_F(m          | PCR     | CGGCATCGAAGGTGGAAGAGTG  |
| based reagent | ice)               | primers |                         |
| Sequence-     | TRPV4_F(rat        | PCR     | CGTCCA AACCTGCGA        |
| based reagent | )                  | primers | ATGAAGTTC               |
| Sequence-     | TRPV4_F(rat        | PCR     | CCTCCATCTCTTGTTGTCACTGG |
| based reagent | )                  | primers |                         |
| Sequence-     | ANP                | PCR     | ATCTGATGGATTTCAAGAACC   |
| based reagent | (Nppa)_F(rat)      | primers |                         |
| Sequence-     | ANP                | PCR     | CTCTGAGACGGGTTGACTTC    |
| based reagent | (Nppa)_R(rat       | primers |                         |
|               | )                  |         |                         |
| Sequence-     | BNP                | PCR     | CAATCCACGATGCAGAAGCT    |
| based reagent | (Nppb)_F(rat       | primers |                         |

|                        |                             |               |                |                        |
|------------------------|-----------------------------|---------------|----------------|------------------------|
| Sequence-based reagent | )<br>BNP<br>(Nppb)_R(rat)   |               | PCR primers    | GGGCCTTGGTCCTTTGAGA    |
| Sequence-based reagent | )<br>GAPDH_F(rat)           |               | PCR primers    | ATGGGAAGCTGGTCATCAAC   |
| Sequence-based reagent | GAPDH_R(rat)                |               | PCR primers    | GTGGTTCACACCCATCACAA   |
| Antibody               | Anti-GAPDH HRP              | Bioworld      | Cat# MB001H    | Western blot (1:10000) |
| Antibody               | Anti-TRPV4                  | Alomone labs  | Cat# ACC-0.34  | Western blot (1:500)   |
| Antibody               | Anti-P(Thr287)-CaMKII       | Abcam         | Cat# ab182647  | Western blot (1:500)   |
| Antibody               | Anti-CAMKII                 | Abcam         | Cat# Ab52476   | Western blot (1:1000)  |
| Antibody               | Anti-P(Ser536)-P65          | Affinity      | Cat# AF2006    | Western blot (1:500)   |
| Antibody               | Anti-P65                    | Affinity      | Cat# AF5006    | Western blot (1:500)   |
| Antibody               | Anti-NLRP3                  | CST           | Cat# 15101     | Western blot (1:500)   |
| Antibody               | Anti-ASC                    | CST           | Cat# 67824     | Western blot (1:1000)  |
| Antibody               | Anti-Cleaved-Caspase 1, p20 | Affinity      | Cat# AF4005    | Western blot (1:500)   |
| Antibody               | Anti-IL 1 $\beta$           | Abcam         | Cat# Ab234437  | Western blot (1:1000)  |
| Antibody               | Anti-IL-6                   | CST           | Cat# 11948     | Western blot (1:500)   |
| Antibody               | Anti-TNF- $\alpha$          | CST           | Cat# 11948     | Western blot (1:1000)  |
| Antibody               | Goat Anti-Rabbit IgG HRP    | Affinity      | Cat# S001      | Western blot (1:3000)  |
| Antibody               | Anti- $\alpha$ -actinin     | Abcam         | Cat # Ab137346 | ICC (1:500)            |
| Others                 | pentobarbital sodium        | Sigma Aldrich | Cat# 76-74-4   |                        |
| Others                 | collagenase II              | Worthington   | Cat# ls004176  |                        |

|        |                                         |                 |                     |
|--------|-----------------------------------------|-----------------|---------------------|
| Others | Percoll                                 | Cytiva          | Cat#<br>17089109    |
| Others | Fluo-4/AM                               | AAT<br>Bioquest | cat# AAT-<br>B20401 |
| Others | F - 127                                 | Solarbio        | Cat# P679           |
| Others | cDNA<br>reverse<br>transcription<br>kit | Vazyme          | Cat#<br>R211-01     |
| Others | SYBR Green<br>PCR Master<br>Mix Kit     | CWbio           | Cat #<br>cw3008h    |

---

367

368 **Human heart tissues**

369 Explanted, heart failure tissues were obtained from five patients with dilated cardiomyopathy  
370 (DCM) undergoing cardiac transplantation. Non-heart failure tissues were obtained from three  
371 organ donors whose hearts could not be placed due to size issues, ABO mismatch, or other  
372 factors. The study was in accordance with the Declaration of Helsinki (as revised in 2013). The  
373 study was reviewed and approved by the Ethics Committee of Union Hospital, Tongji Medical  
374 College, Huazhong University of Science and Technology (Wuhan, China; approval number:  
375 UHCT21001). Written informed consent was obtained from all the patients.

376 **Animals**

377 Male C57BL/6 mice and new-born SD rats were purchased from the Laboratory Animal Center,  
378 Xuzhou Medical University (Xuzhou, China). TRPV4<sup>-/-</sup> mice were generated on C57BL/6  
379 background as described previously(Dong, et al.,2017; Mizuno, et al.,2003). Genotyping was  
380 performed by PCR using ear punch/tail snip biopsies with the following primers: WT forward  
381 primer 5'-TGTTCTGGGTGGTTTGGCCAGGATAT-3' and reverse primer 5'-  
382 GGTGAACCAAAGGACACTTGCATAG-3', which produce a 796-bp product from the wild-

383 type allele; knockout forward primer 5'-GCTGCATACGCTTGATCCGGCTAC-3' and reverse  
384 primer 5'-TAAAGCACGAGG AAGCGGTCAGCC-3', which produce a 366-bp product from  
385 the target allele (Supplemental Figure S1A). RT-PCR of heart mRNA was used to confirm the  
386 deletion of TRPV4 sequence, indicated by a 534-bp cDNA fragment of WT mice, but absence  
387 in TRPV4<sup>-/-</sup> mice (Supplemental Figure S1B), as previously described (Boudaka, et al.,2020).  
388 All animal protocols were performed in adherence with the National Institutes of Health  
389 Guidelines and were approved by the Experimental Animal Ethics Committee of Xuzhou  
390 Medical University. Animals were housed in a temperature-regulated room (12 h day/12 h night  
391 cycle) with ad libitum access to food and water.

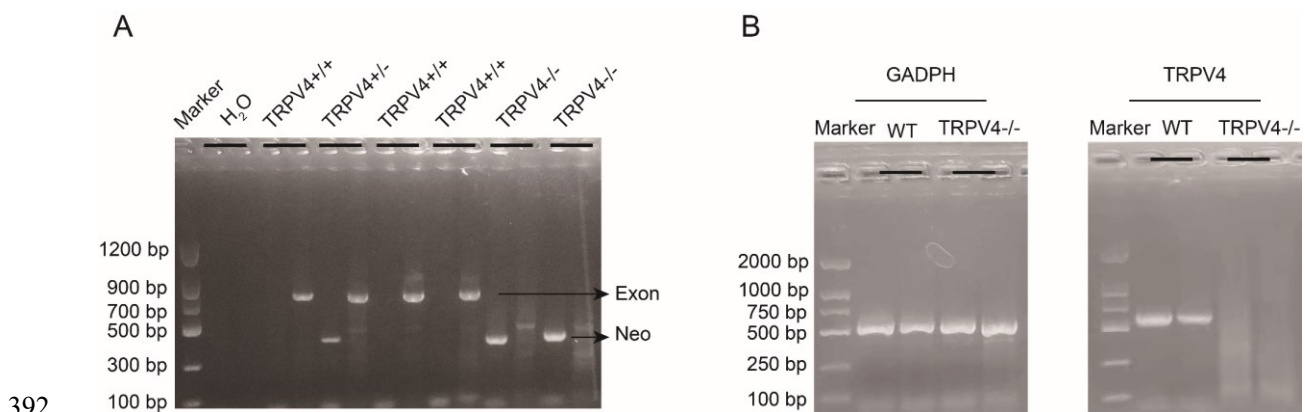

392  
393 **Figure supplement 1. Genotyping of TRPV4 wild-type and TRPV4<sup>-/-</sup> mice and TRPV4**  
394 **depletion in the heart of TRPV4<sup>-/-</sup> mice. A.** Representative RT-PCR genotyping gel image  
395 of the WT, TRPV4<sup>+/-</sup>, and the TRPV4<sup>-/-</sup>. **B.** RT-PCR of total RNA from heart showing *TRPV4*  
396 mRNA was present in WT mice but absent in TRPV4<sup>-/-</sup> mice.

### 397 TAC surgery

398 Eight- to 12-week-old male WT and TRPV4<sup>-/-</sup> mice were subjected to TAC to induce pressure  
399 overload. Mice were anesthetized by intraperitoneal (i.p.) injection of pentobarbital sodium  
400 (50 mg/kg), intubated via the oral cavity, and ventilated at 110 breaths/min. Following a

401 sternotomy, the transverse aorta between the right innominate and left carotid arteries was  
402 dissected and banded with a blunt L type 27-gauge needle using a 5-0 silk suture. The needle  
403 was then removed. Successful TAC surgery was confirmed by measuring the right carotid/left  
404 carotid flow velocity ratio. The sham-operated mice underwent an identical procedure but  
405 without aortic constriction.

#### 406 **Echocardiography**

407 Echocardiography was performed 4 weeks after TAC by using a Vevo 2100 Ultrasound System  
408 (Visual Sonics, Toronto, Canada) as described in a previous study(Chen, et al.,2019). Briefly,  
409 the mice were anesthetized with isoflurane. Parasternal long- and short-axis views in B- and  
410 M-Mode were recorded when the heart rate of the mice was maintained at 430-480  
411 beats/minute. The EF, FS, left ventricular end-systolic diameter (LVID), LV mass, and other  
412 function parameters were calculated with Vevo LAB software (Visual Sonics, Toronto, Canada)  
413 by a technician who was blinded to the treatment groups.

#### 414 **Tissue collection**

415 After the echo examination, the heart was harvested and rinsed with cold phosphate-buffered  
416 saline (PBS). After being weighted, the LV was cut into two parts. The top part was put into  
417 4% paraformaldehyde for histological analysis, and the bottom part was quickly put into liquid  
418 nitrogen and transferred to a -80° freezer later. The HW normalized to BW and to TL were  
419 measured as indicators of cardiac hypertrophy(Zhao, et al.,2016).

#### 420 **Histological analyses**

421 For histological analysis, transverse LV sections were cut into 4- $\mu$ m slices. The hematoxylin &  
422 eosin (H&E) staining was performed to analyze the histological change. Masson's trichrome

423 stain was performed to assess cardiac fibrosis. FITC-conjugated wheat germ agglutinin (WGA)  
424 was performed for further determination of cell size. A quantitative digital image analysis  
425 system (Image J software) was used in image measurement.

#### 426 **Isolation of NRVMs and treatment**

427 NRVMs were isolated according to previously established protocols(Golden, et al.,2012). In  
428 brief, LV from 1-3-day-old SD rats was harvested and digested in the presence of 0.5 mg/mL  
429 collagenase II at 37 °C. NRVMs were further purified by Percoll gradient centrifugation. Cells  
430 were plated at a density of  $2.5 \times 10^5$  cells/cm<sup>2</sup> on collagen-coated plates and cultured in  
431 Dulbecco's modified Eagle's medium (DMEM) supplemented with 15% fetal bovine serum  
432 (FBS; Hyclone, USA), 100 units/ml penicillin, 100 µg/ml streptomycin, and 2 µg/ml cytosine  
433 arabinoside. The next morning, the media was changed to FBS-free DMEM for 24 h.  
434 Ventricular myocyte hypertrophy was induced by treatment with Ang II or PE for 48 h. In  
435 another group of experiments, cells were treated with TRPV4 agonist GSK790A (500 nM)  
436 according to the time required for the experiment, while TRPV4 antagonist GSK3874 (300  
437 nM), KN92(2.0 µM), and KN93(2.0 µM) was applied 30 min earlier.

#### 438 **Assessment of cell surface area**

439 NRVMs were stained with antibodies for sarcomeric  $\alpha$ -actinin and cell nuclei were  
440 counterstained with DAPI. Cell size was examined by TRICT-phalloidin staining assay and  
441 measured with Image J software.

#### 442 **Calcium Fluorescence**

443 Calcium imaging was performed as previously described(Wang, et al.,2019; Wu, et al.,2017).  
444 NRVMs were loaded with Fluo-4/AM (2 µM) and F-127(0.03%) for 30 min. Cells in 96-wells

445 plates were illuminated at 488 nm and fluorescence emissions at 525 nm were captured by a  
446 multifunctional microplate reader (TECAN, Infinite® 200PRO, Swiss). Cells were stimulated  
447 with the TRPV4 agonist GSK790A (500 nM). A21387 (1  $\mu$ M) was set as a positive control.

#### 448 **RNA Extraction, cDNA Synthesis, and Quantitative PCR**

449 Total RNA was extracted from LV tissues or cultured NRVMs using the Extraction Kit  
450 according to the manufacturer's instructions. For cDNA synthesis, 500 ng RNA was reverse  
451 transcribed using a highly capacity cDNA reverse transcription kit. Real-time quantitative PCR  
452 (qPCR) was performed with SYBR Green PCR Master Mix Kit on a QuantStudio 3 system  
453 (Applied Biosystems, Foster City, CA). GAPDH was used as a housekeeper gene for the  
454 normalization of gene expression. The primers used in qPCR were listed in the Key resources  
455 table. The result for each gene was obtained from at least six independent experiments.

#### 456 **Western blots**

457 Total protein was extracted from LV tissues or cultured NRVMs with RIPA reagent. Then,  
458 protein expression was analyzed by standard western blot as described previously(Wu, et  
459 al.,2020). Briefly, protein (30  $\mu$ g for each sample) was separated using 10% SDS-  
460 polyacrylamide gel electrophoresis and subsequently transferred onto polyvinylidene  
461 difluoride membranes (Millipore, Darmstadt, Germany). After 1 h of blocking with Western  
462 blocking buffer (CWbio, Taizhou, China), the membranes were incubated with primary  
463 antibody at 4 °C. The next day, the membranes were washed with TBST and incubated with  
464 corresponding horseradish peroxidase (HRP)-conjugated secondary antibodies for 1 h at room  
465 temperature. Finally, proteins were visualized with the enhanced chemiluminescence kit  
466 (Affinity, Ancaster, ON, Canada). Band intensity was quantified by Tanon image plus software

467 (Tanon, Nanjing, China). GAPDH was used as a loading control. The antibodies used in the  
468 study were listed in the Key resources table.

#### 469 **Statistical analysis**

470 All statistical data were presented as mean  $\pm$  SD and analyzed by Graphpad prism 9. An  
471 unpaired two-tailed student's t-test was used for comparison between the two groups. The  
472 differences among multiple groups were analyzed using one-way ANOVA or two-way ANOVA  
473 followed by the Bonferroni adjustment for multiple comparisons.  $P < 0.05$  was reported as  
474 statistically significant.

475

#### 476 **References:**

477 Adamo L, Rocha-Resende C, Prabhu SD, Mann DL. 2020. Reappraising the role of  
478 inflammation in heart failure. *Nat Rev Cardiol* doi:10.1038/s41569-019-0315-x

479 Adapala RK, Kanugula AK, Paruchuri S, Chilian WM, Thodeti CK. 2020. TRPV4 deletion  
480 protects heart from myocardial infarction-induced adverse remodeling via modulation of  
481 cardiac fibroblast differentiation. *Basic Res Cardiol* **115**:14. doi:10.1007/s00395-020-0775-  
482 5

483 Adapala RK, Thoppil RJ, Ghosh K, Cappelli HC, Dudley AC, Paruchuri S, Keshamouni V,  
484 Klagsbrun M, Meszaros JG, Chilian WM, Ingber DE, Thodeti CK. 2016. Activation of  
485 mechanosensitive ion channel TRPV4 normalizes tumor vasculature and improves cancer  
486 therapy. *Oncogene* **35**:314-322. doi:10.1038/onc.2015.83

487 Baier MJ, Klatt S, Hammer KP, Maier LS, Rokita AG. 2020. Ca<sup>2+</sup>/calmodulin-dependent  
488 protein kinase II is essential in hyperacute pressure overload. *J Mol Cell Cardiol* **138**:212-  
489 221. doi:10.1016/j.yjmcc.2019.12.002



- 490 Boudaka A, Saito CT, Tominaga M. 2020. Deletion of TRPV4 enhances in vitro wound healing  
491 of murine esophageal keratinocytes. *Sci Rep* **10**:11349. doi:10.1038/s41598-020-68269-8
- 492 Bui AL, Horwich TB, Fonarow GC. 2011. Epidemiology and risk profile of heart failure. *Nat*  
493 *Rev Cardiol* **8**:30-41. doi:10.1038/nrcardio.2010.165
- 494 Chaigne S, Cardouat G, Louradour J, Vaillant F, Charron S, Sacher F, Ducret T, Guinamard R,  
495 Vigmond E, Hof T. 2021. Transient receptor potential vanilloid 4 channel participates in  
496 mouse ventricular electrical activity. *Am J Physiol Heart Circ Physiol* **320**:H1156-H1169.  
497 doi:10.1152/ajpheart.00497.2020
- 498 Chen M, Xin J, Liu B, Luo L, Li J, Yin W, Li M. 2016. Mitogen-activated protein kinase and  
499 intracellular polyamine signaling is involved in TRPV1 activation-induced cardiac  
500 hypertrophy. *J Am Heart Assoc* **5**doi:10.1161/JAHA.116.003718
- 501 Chen P, Liu J, Ruan H, Zhang M, Wu P, Yimei D, Han B. 2019. Protective effects of  
502 Salidroside on cardiac function in mice with myocardial infarction. *Sci Rep* **9**:18127.  
503 doi:10.1038/s41598-019-54713-x
- 504 Clapham DE. 2003. TRP channels as cellular sensors. *Nature* **426**:517-524.  
505 doi:10.1038/nature02196
- 506 Dong Q, Li J, Wu QF, Zhao N, Qian C, Ding D, Wang BB, Chen L, Guo KF, Fu D, Han B,  
507 Liao YH, Du YM. 2017. Blockage of transient receptor potential vanilloid 4 alleviates  
508 myocardial ischemia/reperfusion injury in mice. *Sci Rep* **7**:42678. doi:10.1038/srep42678
- 509 Golden HB, Gollapudi D, Gerilechaogetu F, Li J, Cristales RJ, Peng X, Dostal DE. 2012.  
510 Isolation of cardiac myocytes and fibroblasts from neonatal rat pups. *Methods Mol Biol*  
511 **843**:205-214. doi:10.1007/978-1-61779-523-7\_20

- 512 Goyal N, Skrdla P, Schroyer R, Kumar S, Fernando D, Oughton A, Norton N, Sprecher DL,  
513 Cheriyan J. 2019. Clinical pharmacokinetics, safety, and tolerability of a novel, first-in-class  
514 TRPV4 ion channel inhibitor, GSK2798745, in healthy and heart failure subjects. *Am J*  
515 *Cardiovasc Drugs* doi:10.1007/s40256-018-00320-6
- 516 Hof T, Chaigne S, Recalde A, Salle L, Brette F, Guinamard R. 2019. Transient receptor  
517 potential channels in cardiac health and disease. *Nat Rev Cardiol* **16**:344-360.  
518 doi:10.1038/s41569-018-0145-2
- 519 Jones JL, Peana D, Veteto AB, Lambert MD, Nourian Z, Karasseva NG, Hill MA, Lindman  
520 BR, Baines CP, Krenz M, Domeier TL. 2019. TRPV4 increases cardiomyocyte calcium  
521 cycling and contractility yet contributes to damage in the aged heart following hypoosmotic  
522 stress. *Cardiovasc Res* **115**:46-56. doi:10.1093/cvr/cvy156
- 523 Kalman JM, Lavandero S, Mahfoud F, Nahrendorf M, Yacoub MH, Zhao D. 2019. Looking  
524 back and thinking forwards - 15 years of cardiology and cardiovascular research. *Nat Rev*  
525 *Cardiol* **16**:651-660. doi:10.1038/s41569-019-0261-7
- 526 Koch SE, Mann A, Jones S, Robbins N, Alkhattabi A, Worley MC, Gao X, Lasko-Roiniotis  
527 VM, Karani R, Fulford L, Jiang M, Nieman M, Lorenz JN, Rubinstein J. 2017. Transient  
528 receptor potential vanilloid 2 function regulates cardiac hypertrophy via stretch-induced  
529 activation. *J Hypertens* **35**:602-611. doi:10.1097/HJH.0000000000001213
- 530 Kumar H, Lim CS, Choi H, Joshi HP, Kim KT, Kim YH, Park CK, Kim HM, Han IB. 2020.  
531 Elevated TRPV4 levels contribute to endothelial damage and scarring in experimental spinal  
532 cord injury. *J Neurosci* **40**:1943-1955. doi:10.1523/JNEUROSCI.2035-19.2020
- 533 Liao J, Wu Q, Qian C, Zhao N, Zhao Z, Lu K, Zhang S, Dong Q, Chen L, Li Q, Du Y. 2020.

- 534 TRPV4 blockade suppresses atrial fibrillation in sterile pericarditis rats. *JCI Insight*  
535 **5**:e137528. doi:10.1172/jci.insight.137528
- 536 Ling H, Gray CB, Zambon AC, Grimm M, Gu Y, Dalton N, Purcell NH, Peterson K, Brown  
537 JH. 2013. Ca<sup>2+</sup>/Calmodulin-dependent protein kinase II $\delta$  delta mediates myocardial  
538 ischemia/reperfusion injury through nuclear factor- $\kappa$ B. *Circ Res* **112**:935-944.  
539 doi:10.1161/CIRCRESAHA.112.276915
- 540 Ljubojevic-Holzer S, Herren AW, Djalalinac N, Voglhuber J, Morotti S, Holzer M, Wood BM,  
541 Abdellatif M, Matzer I, Sacherer M, Radulovic S, Wallner M, Ivanov M, Wagner S, Sossalla  
542 S, von Lewinski D, Pieske B, Brown JH, Sedej S, Bossuyt J, Bers DM. 2020. CaMKII $\delta$ C  
543 drives early adaptive Ca<sup>2+</sup> change and late eccentric cardiac hypertrophy. *Circ Res* **127**:1159-  
544 1178. doi:10.1161/CIRCRESAHA.120.316947
- 545 Lorin C, Vogeli I, Niggli E. 2015. Dystrophic cardiomyopathy: role of TRPV2 channels in  
546 stretch-induced cell damage. *Cardiovasc Res* **106**:153-162. doi:10.1093/cvr/cvv021
- 547 Lyons JS, Joca HC, Law RA, Williams KM, Kerr JP, Shi G, Khairallah RJ, Martin SS,  
548 Konstantopoulos K, Ward CW, Stains JP. 2017. Microtubules tune mechanotransduction  
549 through NOX2 and TRPV4 to decrease sclerostin abundance in osteocytes. *Sci Signal*  
550 **10**doi:10.1126/scisignal.aan5748
- 551 Martinon F, Tschopp J. 2004. Inflammatory caspases: linking an intracellular innate immune  
552 system to autoinflammatory diseases. *Cell* **117**:561-574. doi:10.1016/j.cell.2004.05.004
- 553 Mizuno A, Matsumoto N, Imai M, Suzuki M. 2003. Impaired osmotic sensation in mice lacking  
554 TRPV4. *Am J Physiol Cell Physiol* **285**:C96-C101. doi:10.1152/ajpcell.00559.2002
- 555 Morine KJ, Paruchuri V, Qiao X, Aronovitz M, Huggins GS, DeNofrio D, Kiernan MS, Karas

- 556 RH, Kapur NK. 2016. Endoglin selectively modulates transient receptor potential channel  
557 expression in left and right heart failure. *Cardiovasc Pathol* **25**:478-482.  
558 doi:10.1016/j.carpath.2016.08.004
- 559 Nakamura M, Sadoshima J. 2018. Mechanisms of physiological and pathological cardiac  
560 hypertrophy. *Nat Rev Cardiol* **15**:387-407. doi:10.1038/s41569-018-0007-y
- 561 Neubauer S. 2007. The failing heart--an engine out of fuel. *N Engl J Med* **356**:1140-1151.  
562 doi:10.1056/NEJMra063052
- 563 Peana D, Polo-Parada L, Domeier TL. 2021. Arrhythmogenesis in the aged heart following  
564 ischaemia-reperfusion: role of transient receptor potential vanilloid 4. *Cardiovasc*  
565 *Res*doi:10.1093/cvr/cvab141
- 566 Randhawa PK, Jaggi AS. 2015. TRPV4 channels: physiological and pathological role in  
567 cardiovascular system. *Basic Res Cardiol* **110**:54. doi:10.1007/s00395-015-0512-7
- 568 Stewart GM, Johnson BD, Sprecher DL, Reddy Y, Obokata M, Goldsmith S, Bart B, Oughton  
569 A, Fillmore C, Behm DJ, Borlaug BA. 2020. Targeting pulmonary capillary permeability to  
570 reduce lung congestion in heart failure: a randomized, controlled pilot trial. *Eur J Heart Fail*  
571 **22**:1641-1645. doi:10.1002/ejhf.1809
- 572 Suetomi T, Miyamoto S, Brown JH. 2019. Inflammation in nonischemic heart disease:  
573 initiation by cardiomyocyte CaMKII and NLRP3 inflammasome signaling. *Am J Physiol*  
574 *Heart Circ Physiol* **317**:H877-H890. doi:10.1152/ajpheart.00223.2019
- 575 Suetomi T, Willeford A, Brand CS, Cho Y, Ross RS, Miyamoto S, Brown JH. 2018.  
576 Inflammation and NLRP3 inflammasome activation initiated in response to pressure  
577 overload by Ca<sup>2+</sup>/calmodulin-dependent protein kinase II $\delta$  signaling in cardiomyocytes are

- 578 essential for adverse cardiac remodeling. *Circulation* **138**:2530-2544.  
579 doi:10.1161/CIRCULATIONAHA.118.034621
- 580 Swaminathan PD, Purohit A, Hund TJ, Anderson ME. 2012. Calmodulin-dependent protein  
581 kinase II: linking heart failure and arrhythmias. *Circ Res* **110**:1661-1677.  
582 doi:10.1161/CIRCRESAHA.111.243956
- 583 Wang B, Wu Q, Liao J, Zhang S, Liu H, Yang C, Dong Q, Zhao N, Huang Z, Guo K, Du Y.  
584 2019. Propofol induces cardioprotection against ischemia-reperfusion injury via suppression  
585 of transient receptor potential vanilloid 4 channel. *Front Pharmacol* **10**:1150.  
586 doi:10.3389/fphar.2019.01150
- 587 Wang S, He H, Long J, Sui X, Yang J, Lin G, Wang Q, Wang Y, Luo Y. 2021. TRPV4 regulates  
588 soman-induced status epilepticus and secondary brain injury via NMDA receptor and  
589 NLRP3 inflammasome. *Neurosci Bull* **37**:905-920. doi:10.1007/s12264-021-00662-3
- 590 Wang Z, Zhou L, An D, Xu W, Wu C, Sha S, Li Y, Zhu Y, Chen A, Du Y, Chen L, Chen L.  
591 2019. TRPV4-induced inflammatory response is involved in neuronal death in pilocarpine  
592 model of temporal lobe epilepsy in mice. *Cell Death Dis* **10**:386. doi:10.1038/s41419-019-  
593 1612-3
- 594 White JP, Cibelli M, Urban L, Nilius B, McGeown JG, Nagy I. 2016. TRPV4: molecular  
595 conductor of a diverse orchestra. *Physiol Rev* **96**:911-973. doi:10.1152/physrev.00016.2015
- 596 Willeford A, Suetomi T, Nickle A, Hoffman HM, Miyamoto S, Heller BJ. 2018. CaMKIIdelta-  
597 mediated inflammatory gene expression and inflammasome activation in cardiomyocytes  
598 initiate inflammation and induce fibrosis. *JCI Insight* **3**doi:10.1172/jci.insight.97054
- 599 Woolums BM, McCray BA, Sung H, Tabuchi M, Sullivan JM, Ruppell KT, Yang Y, Mamah

- 600 C, Aisenberg WH, Saavedra-Rivera PC, Larin BS, Lau AR, Robinson DN, Xiang Y, Wu  
601 MN, Sumner CJ, Lloyd TE. 2020. TRPV4 disrupts mitochondrial transport and causes  
602 axonal degeneration via a CaMKII-dependent elevation of intracellular Ca<sup>2+</sup>. *Nat Commun*  
603 **11**:2679. doi:10.1038/s41467-020-16411-5
- 604 Wu Q, Liu H, Liao J, Zhao N, Tse G, Han B, Chen L, Huang Z, Du Y. 2020. Colchicine  
605 prevents atrial fibrillation promotion by inhibiting IL-1 $\beta$ -induced IL-6 release and atrial  
606 fibrosis in the rat sterile pericarditis model. *Biomed Pharmacother* **129**:110384.  
607 doi:10.1016/j.biopha.2020.110384
- 608 Wu Q, Lu K, Zhao Z, Wang B, Liu H, Zhang S, Liao J, Zeng Y, Dong Q, Zhao N, Han B, Du  
609 Y. 2019. Blockade of transient receptor potential vanilloid 4 enhances antioxidation after  
610 myocardial ischemia/reperfusion. *Oxid Med Cell Longev* **2019**:7283683.  
611 doi:10.1155/2019/7283683
- 612 Wu QF, Qian C, Zhao N, Dong Q, Li J, Wang BB, Chen L, Yu L, Han B, Du YM, Liao YH.  
613 2017. Activation of transient receptor potential vanilloid 4 involves in  
614 hypoxia/reoxygenation injury in cardiomyocytes. *Cell Death Dis* **8**:e2828.  
615 doi:10.1038/cddis.2017.227
- 616 Xiao YF, Zeng ZX, Guan XH, Wang LF, Wang CJ, Shi H, Shou W, Deng KY, Xin HB. 2018.  
617 FKBP12.6 protects heart from AngII-induced hypertrophy through inhibiting Ca<sup>2+</sup>  
618 /calmodulin-mediated signalling pathways in vivo and in vitro. *J Cell Mol Med* **22**:3638-  
619 3651. doi:10.1111/jcmm.13645
- 620 Zhang Q, Qi H, Cao Y, Shi P, Song C, Ba L, Chen Y, Gao J, Li S, Li B, Sun H. 2018. Activation  
621 of transient receptor potential vanilloid 3 channel (TRPV3) aggravated pathological cardiac

622 hypertrophy via calcineurin/NFATc3 pathway in rats. *J Cell Mol Med* **22**:6055-6067.

623 doi:10.1111/jcmm.13880

624 Zhang T, Maier LS, Dalton ND, Miyamoto S, Ross JJ, Bers DM, Brown JH. 2003. The  $\delta$ C

625 isoform of CaMKII is activated in cardiac hypertrophy and induces dilated cardiomyopathy

626 and heart failure. *Circ Res* **92**:912-919. doi:10.1161/01.RES.0000069686.31472.C5

627 Zhao L, Cheng G, Jin R, Afzal MR, Samanta A, Xuan YT, Girgis M, Elias HK, Zhu Y, Davani

628 A, Yang Y, Chen X, Ye S, Wang OL, Chen L, Hauptman J, Vincent RJ, Dawn B. 2016.

629 Deletion of interleukin-6 attenuates pressure overload-induced left ventricular hypertrophy

630 and dysfunction. *Circ Res* **118**:1918-1929. doi:10.1161/CIRCRESAHA.116.308688

631 Zhou L, Xu W, An D, Sha S, Men C, Li Y, Wang X, Du Y, Chen L. 2021. Transient receptor

632 potential vanilloid 4 activation inhibits the delayed rectifier potassium channels in

633 hippocampal pyramidal neurons: An implication in pathological changes following

634 pilocarpine-induced status epilepticus. *J Neurosci Res* **99**:914-926. doi:10.1002/jnr.24749

635

### 636 **Acknowledgements**

637 The authors thank Prof. Atsuko Mizuno (Jichi Medical University, Japan) for TRPV4<sup>-/-</sup> mice.

638 Dr. Yimei Du thanks Jenny Xiao (Columbia University, New York, USA) for editing the

639 manuscript and checking for grammatical errors.

### 640 **Funding**

641 This work was supported by the National Health Commission of Xuzhou (XWKYHT20200069)

642 and by the National Natural Science Foundation of China (82170326 and 81770328 to Y.D.).

### 643 **Declaration of interests**

644 The authors declare no competing interests.

645 **Resource sharing**

646 Further information and reasonable requests of resources and reagents should be directed to  
647 the lead contact, Yimei Du ([yimeidu@mail.hust.edu.cn](mailto:yimeidu@mail.hust.edu.cn)) or Bing Han  
648 ([hbing777@hotmail.com](mailto:hbing777@hotmail.com)).

649
